# Supplementary material for: Cerebral oxygenation immediately after birth and long-term outcome in preterm neonates—a retrospective analysis
Source: BMC Pediatr. 2023 Mar 30;23:145. doi: 10.1186/s12887-023-03960-z (PMC10061688; doi:10.1186/s12887-023-03960-z)
Supplement: Supplementary file 1 — Supplementary Material 1 [file 12887_2023_3960_MOESM1_ESM.docx]

**Supplemental**

**Table S1.** Arterial oxygen saturation (SpO2), heart rate (HR) and fraction of inspired oxygen (FiO2) of 13 preterm neonates of the adverse outcome group and 29 preterm neonates of the favorable outcome group. Data are presented as estimated means (95%CI).

|  | Adverse outcome group  n = 13 | Favorable outcome group  n = 29 | *p-value* |
| --- | --- | --- | --- |
| Arterial oxygen saturation (%) | | | |
| SpO2 min 2 | 53 (44-61) | 61 (56-67) | *0.086* |
| SpO2 min 3 | 55 (47-63) | 65 (59-70) | *0.053* |
| SpO2 min 4 | 66 (58-74) | 67 (62-72) | *0.917* |
| SpO2 min 5 | 73 (66-81) | 72 (67-77) | *0.767* |
| SpO2 min 6 | 80 (72-88) | 78 (73-83) | *0.654* |
| SpO2 min 7 | 82 (74-90) | 82 (76-87) | *0.911* |
| SpO2 min 8 | 84 (77-92) | 84 (79-89) | *0.922* |
| SpO2 min 9 | 82 (75-90) | 86 (81-91) | *0.452* |
| SpO2 min 10 | 81 (74-89) | 87 (82-93) | *0.208* |
| SpO2 min 11 | 85 (77-93) | 90 (84-95) | *0.318* |
| SpO2 min 12 | 86 (78-94) | 90 (85-95) | *0.381* |
| SpO2 min 13 | 89 (81-96) | 90 (84-95) | *0.823* |
| SpO2 min 14 | 89 (81-96) | 91 (85-96) | *0.704* |
| SpO2 min 15 | 86 (78-94) | 91 (86-96) | *0.288* |
|  |  |  |  |
| Heart rate (bpm) | | | |
| HR min 2 | 116 (100-133) | 129 (118-140) | *0.206* |
| HR min 3 | 117 (100-133) | 130 (1204-141) | *0.170* |
| HR min 4 | 135 (119-151) | 135 (124-145) | *0.956* |
| HR min 5 | 140 (123-156) | 138 (128-149) | *0.904* |
| HR min 6 | 139 (123-155) | 139 (129-149) | *0.994* |
| HR min 7 | 142 (126-158) | 138 (128-149) | *0.699* |
| HR min 8 | 147 (131-163) | 139 (128-149) | *0.379* |
| HR min 9 | 148 (132-164) | 140 (130-151) | *0.418* |
| HR min 10 | 151 (135-168) | 144 (133-154) | *0.430* |
| HR min 11 | 156 (140-172) | 146 (136-157) | *0.316* |
| HR min 12 | 159 (143-176) | 149 (139-160) | *0.319* |
| HR min 13 | 160 (144-176) | 148 (138-159) | *0.213* |
| HR min 14 | 160 (144-177) | 148 (138-159) | *0.212* |
| HR min 15 | 161 (145-177) | 154 (143-164) | *0.450* |
|  |  |  |  |
| Fraction of inspired oxygen (%) | | | |
| FiO2 min 2 | 34 (26-42) | 29 (23-35) | *0.380* |
| FiO2 min 3 | 38 (30-45) | 29 (24-35) | *0.102* |
| FiO2 min 4 | 38 (30-45) | 33 (27-39) | *0.301* |
| FiO2 min 5 | 40 (32-47) | 37 (31-43) | *0.616* |
| FiO2 min 6 | 40 (32-47) | 38 (33-44) | *0.810* |
| FiO2 min 7 | 43 (35-50) | 38 (32-44) | *0.382* |
| FiO2 min 8 | 42 (34-50) | 37 (31-43) | *0.294* |
| FiO2 min 9 | 42 (34-50) | 35 (29-41) | *0.150* |
| FiO2 min 10 | 42 (34-50) | 33 (27-39) | *0.079* |
| FiO2 min 11 | 44 (36-53) | 33 (27-39) | *0.030** |
| FiO2 min 12 | 44 (35-52) | 35 (29-41) | *0.340* |
| FiO2 min 13 | 39 (31-47) | 34 (28-40) | *0.340* |
| FiO2 min 14 | 36 (27-44) | 32 (25-38) | *0.456* |
| FiO2 min 15 | 34 (26-43) | 30 (23-36) | *0.396* |
